# Supplementary material for: Physiological symmetry of transcranial magnetic stimulation‐evoked EEG spectral features
Source: PubMed Central journal article supplement (PMC9704783; doi:10.1002/hbm.26022), 2022-07-21

**A**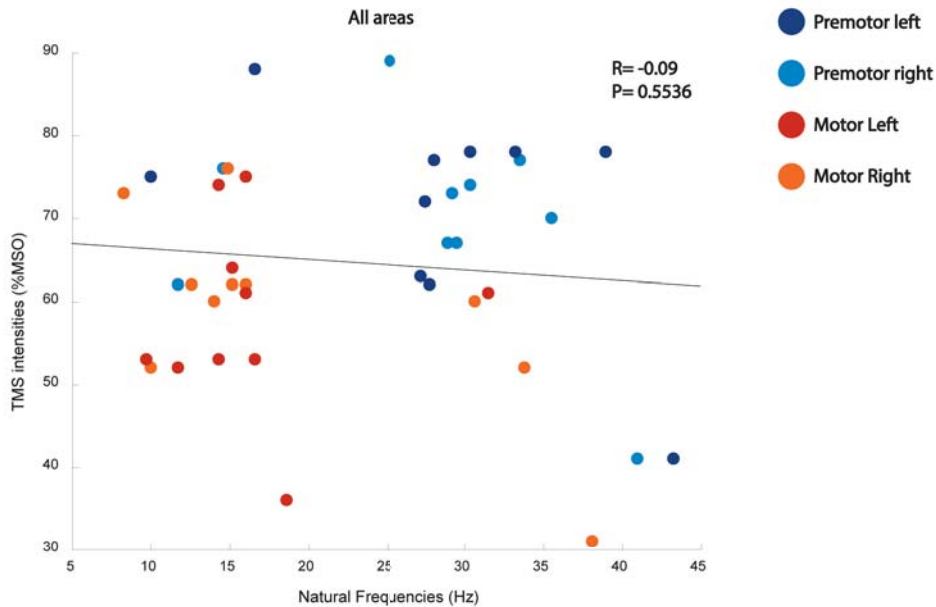**B****Left premotor and left motor areas**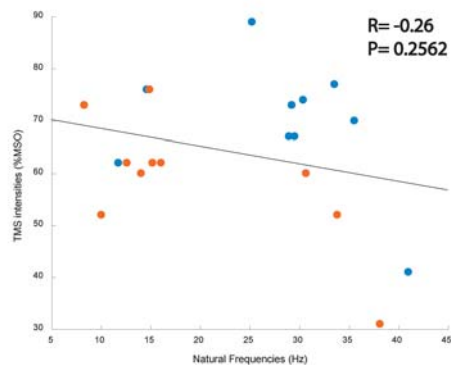**C****Right premotor and right motor areas**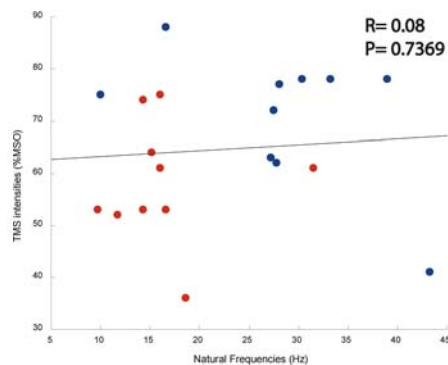

Supplement: HBM-43-5465-s002.pdf [file HBM-43-5465-s002.pdf]
