# Supplementary material for: Physiological symmetry of transcranial magnetic stimulation‐evoked EEG spectral features
Source: PubMed Central journal article supplement (PMC9704783; doi:10.1002/hbm.26022), 2022-07-21

A

Premotor

Principal components

Topography

Component timecourse

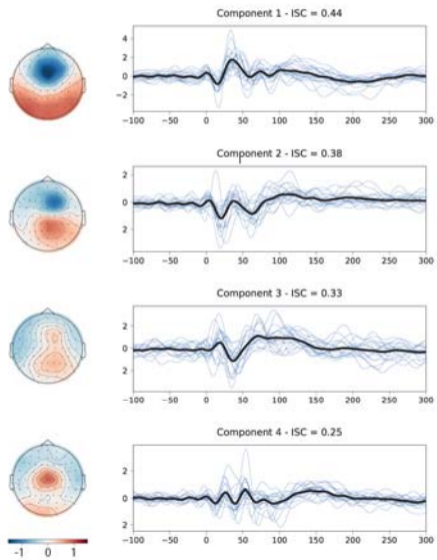

B

Motor

Topography

Component timecourse

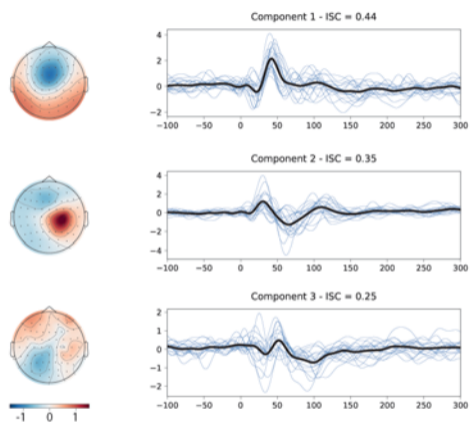

Supplement: HBM-43-5465-s004.pdf [file HBM-43-5465-s004.pdf]
